# Supplementary material for: Modulating oxygen coverage of Ti3C2Tx MXenes to boost catalytic activity for HCOOH dehydrogenation
Source: PubMed Central journal article supplement (PMC7447762; doi:10.1038/s41467-020-18091-7), 2020-08-25
Supplement: 41467_2020_18091_MOESM1_ESM.pdf [file 41467_2020_18091_MOESM1_ESM.pdf]

## **Supplementary Information for**

# **“Modulating Oxygen Coverage of $\text{Ti}_3\text{C}_2\text{T}_x$ MXenes to Boost Catalytic Activity for HCOOH Dehydrogenation”**

Tingting Hou et al.

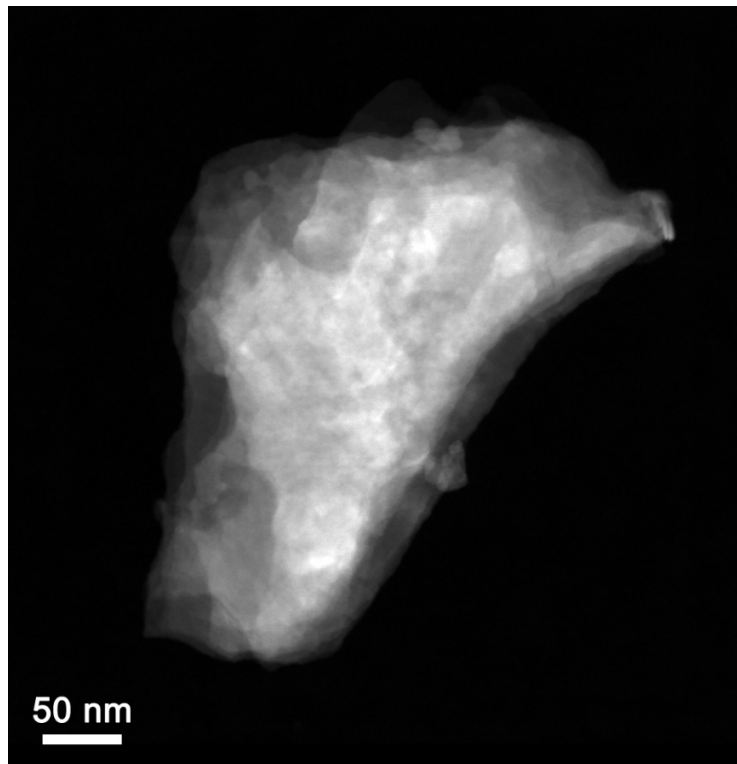

**Supplementary Figure 1.** HAADF-STEM image of Ti<sub>3</sub>C<sub>2</sub>T<sub>x</sub>-25.

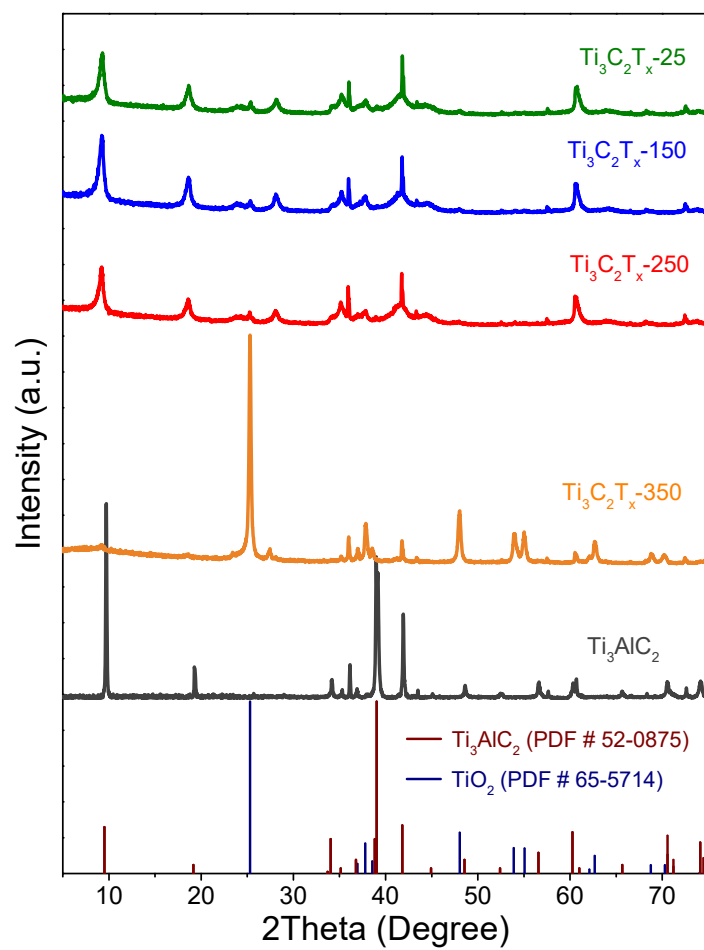

**Supplementary Figure 2.** XRD patterns of  $\text{Ti}_3\text{C}_2\text{T}_x$ -25,  $\text{Ti}_3\text{C}_2\text{T}_x$ -150,  $\text{Ti}_3\text{C}_2\text{T}_x$ -250,  $\text{Ti}_3\text{C}_2\text{T}_x$ -350, and  $\text{Ti}_3\text{AlC}_2$ .

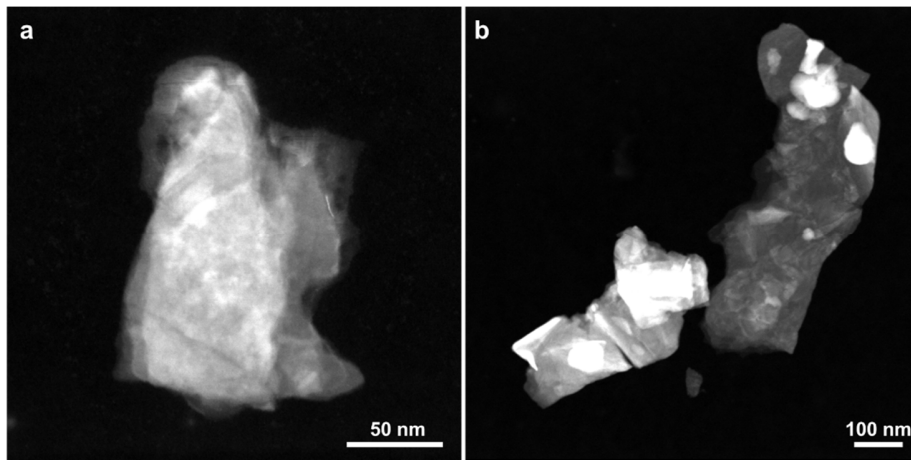

**Supplementary Figure 3.** HAADF-STEM images of (a)  $\text{Ti}_3\text{C}_2\text{T}_x$ -150 and (b)  $\text{Ti}_3\text{C}_2\text{T}_x$ -350.

**Supplementary Table 1.** The BET surface areas of different catalysts.

| Catalyst                                           | BET surface areas (m <sup>2</sup> /g) |
|----------------------------------------------------|---------------------------------------|
| Ti <sub>3</sub> C <sub>2</sub> T <sub>x</sub> -25  | 16                                    |
| Ti <sub>3</sub> C <sub>2</sub> T <sub>x</sub> -150 | 20                                    |
| Ti <sub>3</sub> C <sub>2</sub> T <sub>x</sub> -250 | 21                                    |
| Ti <sub>3</sub> C <sub>2</sub> T <sub>x</sub> -350 | 44                                    |

**Supplementary Table 2.** EXAFS fitting parameters at the Ti K-edge for the obtained samples ( $S_0^2=0.838$ ).

| Sample                                             | Shell  | CN  | $R(\text{\AA})$ | $D. W.$ | $\Delta E_0$ (eV) | $R$ factor |
|----------------------------------------------------|--------|-----|-----------------|---------|-------------------|------------|
| TiO <sub>2</sub>                                   | Ti-O   | 6   | 2.00            | 0.0059  | 1.2               | 0.0063     |
|                                                    | Ti-Ti  | 4   | 2.86            | 0.0086  |                   |            |
| TiC                                                | Ti-C   | 6   | 2.24            | 0.0043  | -6.1              | 0.0081     |
|                                                    | Ti-Ti  | 12  | 3.06            | 0.0034  |                   |            |
| Ti <sub>3</sub> C <sub>2</sub> T <sub>x</sub> -25  | Ti-C/O | 4.5 | 2.13            | 0.0089  | -2.2              | 0.0006     |
|                                                    | Ti-Ti  | 5.4 | 3.01            | 0.0058  |                   |            |
| Ti <sub>3</sub> C <sub>2</sub> T <sub>x</sub> -150 | Ti-C/O | 4.7 | 2.13            | 0.0080  | -3.6              | 0.0008     |
|                                                    | Ti-Ti  | 5.6 | 3.01            | 0.0053  |                   |            |
| Ti <sub>3</sub> C <sub>2</sub> T <sub>x</sub> -250 | Ti-C/O | 4.9 | 2.14            | 0.0085  | -4.2              | 0.0008     |
|                                                    | Ti-Ti  | 5.3 | 3.02            | 0.0052  |                   |            |
| Ti <sub>3</sub> C <sub>2</sub> T <sub>x</sub> -350 | Ti-C/O | 2.9 | 1.97            | 0.0007  | -0.6              | 0.0165     |
|                                                    | Ti-Ti  | 2.4 | 3.02            | 0.0050  |                   |            |

$CN$ , coordination number;  $R(\text{\AA})$ , bond distance;  $D. W.$ , Debye-Waller factor;  $\Delta E_0$ , the inner potential correction to account for the difference in the inner potential between the sample and the reference compound;  $R$  factor, goodness of fit.  $S_0^2$  was set to be 0.838, according to the experimental EXAFS fit of TiO<sub>2</sub> reference by fixing CN as the known crystallographic value.

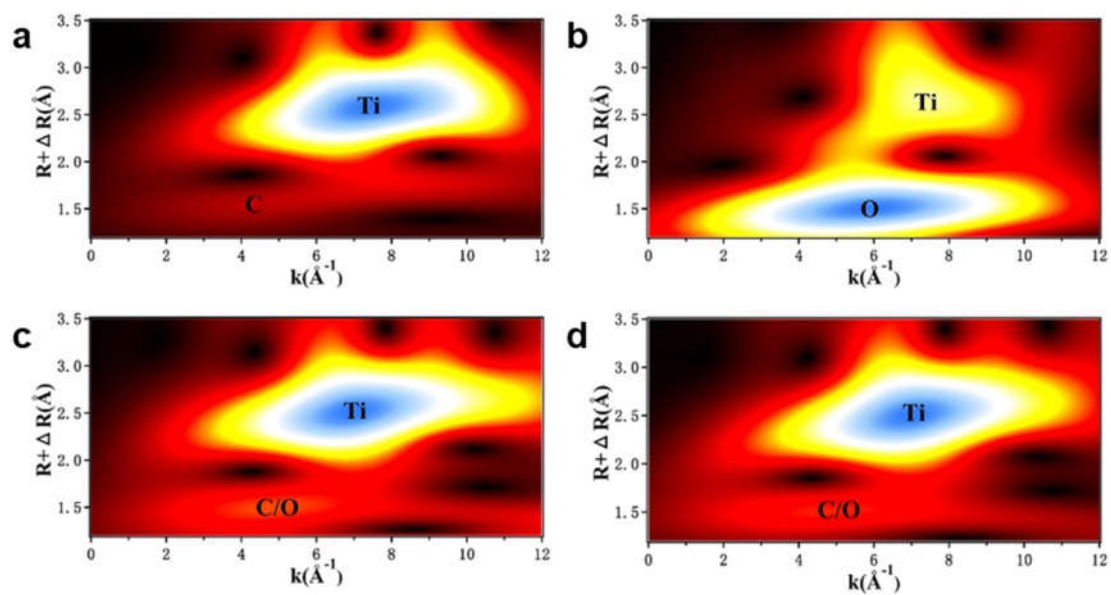

**Supplementary Figure 4.** The wavelet transform analysis in Ti K-edge for (a) TiC, (b) TiO<sub>2</sub>, (c) Ti<sub>3</sub>C<sub>2</sub>T<sub>x</sub>-25, and (d) Ti<sub>3</sub>C<sub>2</sub>T<sub>x</sub>-150.

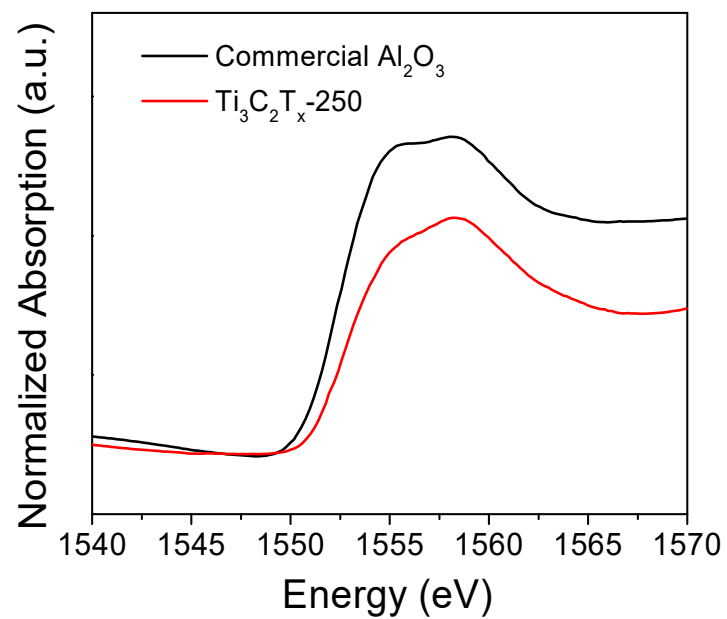

**Supplementary Figure 5.** Al K edge XANES spectra for Ti<sub>3</sub>C<sub>2</sub>T<sub>x</sub>-250 (Commercial Al<sub>2</sub>O<sub>3</sub> was used as reference).



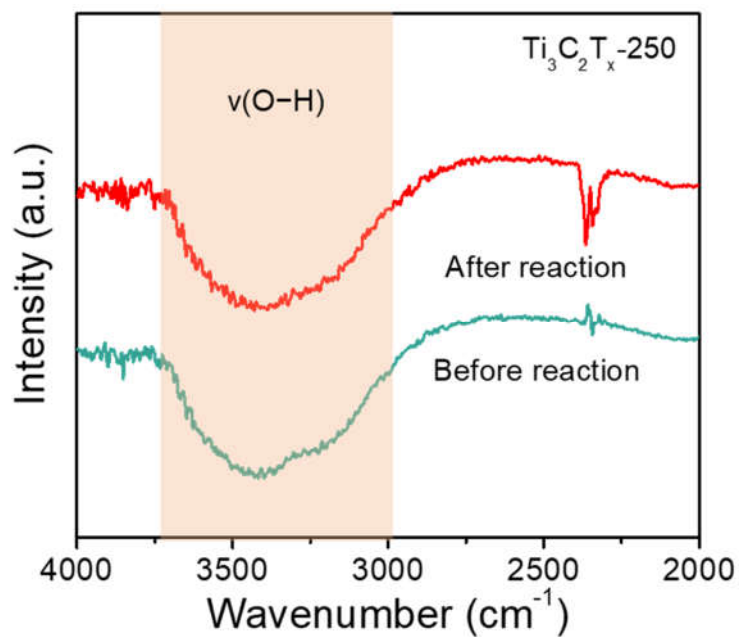

**Supplementary Figure 6.** DRIFT spectra of  $\text{Ti}_3\text{C}_2\text{T}_x-250$  before and after catalytic test. The absorption peak ranging from 3000 to 3700  $\text{cm}^{-1}$  was assigned to the  $\nu(\text{O-H})$  stretching mode of surface OH groups.

**Supplementary Table 3.** The percentages of O-Ti species for different samples determined by XPS spectra of O 1s.

| Sample                                             | The percentages of O-Ti species (%) |
|----------------------------------------------------|-------------------------------------|
| Ti <sub>3</sub> C <sub>2</sub> T <sub>x</sub> -25  | 3.4                                 |
| Ti <sub>3</sub> C <sub>2</sub> T <sub>x</sub> -150 | 7.3                                 |
| Ti <sub>3</sub> C <sub>2</sub> T <sub>x</sub> -250 | 26.5                                |

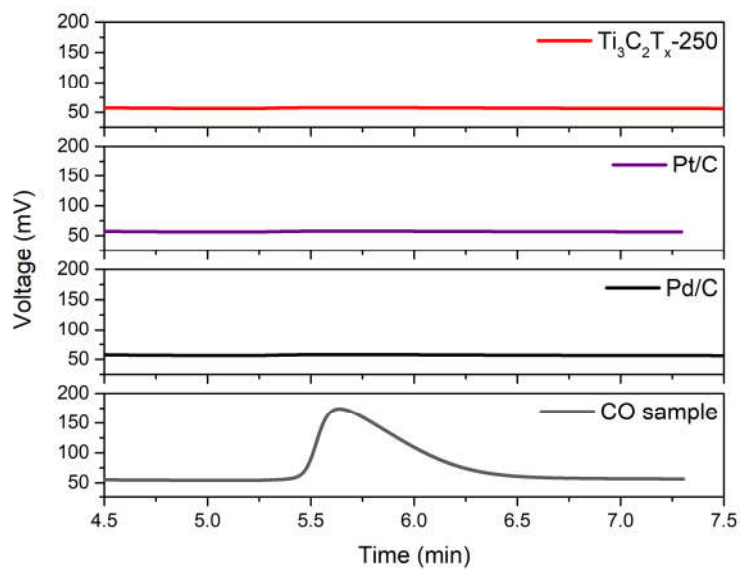

**Supplementary Figure 7.** The gas chromatogram profiles for the detection of CO.

**Supplementary Table 4.** Catalytic performance for the dehydrogenation of formic acid by representative noble-metal based catalysts.<sup>S1-S13</sup>

| Catalyst <sup>(a)</sup>                                                            | Reaction temperature (°C) | Performance <sup>(c)</sup>                                                                | Ref.                                                      |
|------------------------------------------------------------------------------------|---------------------------|-------------------------------------------------------------------------------------------|-----------------------------------------------------------|
| Soybean-Mo (0.1) <sup>(b)</sup>                                                    | 110                       | 90% <sup>(e)</sup>                                                                        | <i>Energ. Convers. Manage.</i> <b>2018</b> , 164, 122     |
| Co(1)/phen(7)/C <sup>(b)</sup>                                                     | 110                       | 220 h <sup>-1</sup>                                                                       | <i>Angew. Chem. Int. Edit.</i> <b>2017</b> , 56, 16616    |
| Se-doped graphene/CoFe <sub>2</sub> O <sub>4</sub> <sup>(b)</sup>                  | 60                        | 306 h <sup>-1</sup>                                                                       | <i>Int. J. Hydrogen Energ.</i> <b>2016</b> , 41, 20147    |
| Fe/ <i>rac</i> -P4                                                                 | 60                        | 1853 h <sup>-1</sup>                                                                      | <i>ACS Catal.</i> <b>2015</b> , 5, 1254                   |
| CdS nanocrystals <sup>(b)</sup>                                                    | 25                        | 116 mmol H <sub>2</sub> g <sup>-1</sup> h <sup>-1</sup> <sup>(d)</sup>                    | <i>Angew. Chem. Int. Edit.</i> <b>2015</b> , 54, 9627     |
| Ni pincer complex                                                                  | 60                        | 209 h <sup>-1</sup>                                                                       | <i>Chemcatchem</i> <b>2015</b> , 7, 65                    |
| Aliphatic Fe pincer complex                                                        | 80                        | 622 h <sup>-1</sup>                                                                       | <i>J. Am. Chem. Soc.</i> <b>2014</b> , 136, 10234         |
| Al-PNP pincer complex                                                              | 65                        | 5200 h <sup>-1</sup>                                                                      | <i>Chem. Sci.</i> <b>2014</b> , 5, 2771                   |
| MoS <sub>2</sub> /Graphene <sup>(b)</sup>                                          | 235                       | 92% <sup>(e)</sup>                                                                        | <i>ACS Catal.</i> <b>2014</b> , 4, 3950                   |
| Fe-PNP pincer complex                                                              | 65                        | 836 h <sup>-1</sup>                                                                       | <i>Chem. Eur. J.</i> <b>2013</b> , 19, 8068               |
| [Fe(BF <sub>4</sub> ) <sub>2</sub> ] <sub>6</sub> H <sub>2</sub> O/PP <sub>3</sub> | 80                        | 9425 h <sup>-1</sup>                                                                      | <i>Science</i> <b>2011</b> , 333, 1733                    |
| [Fe(CO) <sub>3</sub> (PBN <sub>3</sub> ) <sub>2</sub> ]                            | 60                        | 247 <sup>(f)</sup>                                                                        | <i>Angew. Chem., Int. Ed.</i> <b>2010</b> , 49, 8993-8996 |
| Fe <sub>3</sub> (CO) <sub>12</sub> /PPh <sub>3</sub> /tpy                          | 40                        | 200 h <sup>-1</sup>                                                                       | <i>J. Am. Chem. Soc.</i> <b>2010</b> , 132, 8924-8934     |
| Ti <sub>3</sub> C <sub>2</sub> T <sub>x</sub> -200 <sup>(b)</sup>                  | 80                        | 365 mmol H <sub>2</sub> g <sup>-1</sup> h <sup>-1</sup> <sup>(d)</sup> 94% <sup>(e)</sup> | <i>This work</i>                                          |

<sup>(a)</sup>Homogeneous catalyst unless specified; <sup>(b)</sup>heterogeneous catalyst; <sup>(c)</sup>TOF unless specified;

<sup>(d)</sup>mass activity; <sup>(e)</sup>conversion; <sup>(f)</sup>TON.

**Supplementary Table 5.** The calculated TOFs of Ti<sub>3</sub>C<sub>2</sub>T<sub>x</sub>-250, Pd/C, and Pt/C in HCOOH dehydrogenation.

| Samples                                            | TOF (h <sup>-1</sup> ) |
|----------------------------------------------------|------------------------|
| Ti <sub>3</sub> C <sub>2</sub> T <sub>x</sub> -250 | 960                    |
| Pd/C                                               | 2679                   |
| Pt/C                                               | 4585                   |

The surface Ti species were regarded as the active sites. TOF of Ti<sub>3</sub>C<sub>2</sub>T<sub>x</sub>-250 in HCOOH dehydrogenation was calculated to be 960 h<sup>-1</sup> according to the following formula:

$$TOF = \frac{N_{HCOOH}}{N_{surface\ Ti}} = \frac{Mass\ activity \times m_{Ti_3C_2T_x-250} \times N_A}{A_{Ti_3C_2T_x-250} \times m_{Ti_3C_2T_x-250} \times \rho_{surface\ Ti}}$$

Where Mass activity, m<sub>Ti<sub>3</sub>C<sub>2</sub>T<sub>x</sub>-250</sub> and N<sub>A</sub> were 365 mmol/g/h, 30 mg, and 6.02×10<sup>23</sup>. A<sub>Ti<sub>3</sub>C<sub>2</sub>T<sub>x</sub>-250</sub> and ρ<sub>surface Ti</sub> was 21 m<sup>2</sup>/g and 1.09091E+19 m<sup>-2</sup> determined by BET surface area and crystalline structure.

As for Pd/C and Pt/C, TOFs were calculated to be 2679 and 4585 h<sup>-1</sup> according to the following formula, respectively:

$$TOF = \frac{N_{HCOOH}}{N_{surface\ Pd\ or\ Pt}} = \frac{Mass\ activity \times m_{Ti_3C_2T_x-250} \times N_A}{N_{surface\ Pd\ or\ Pt}}$$

Where N<sub>surface Pd or Pt</sub> was determined by CO pulse chemisorption.

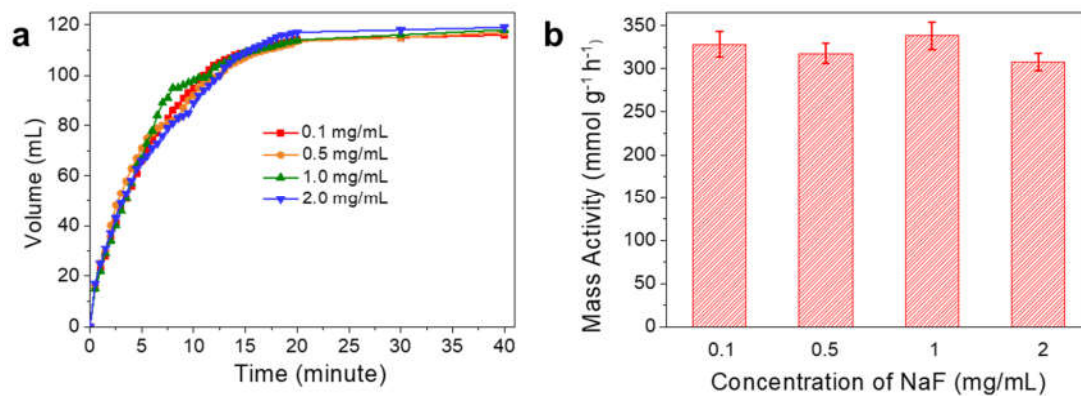

**Supplementary Figure 8.** Comparison of the (A) volume of the generated gas *vs* reaction time and (B) the mass activity of Ti<sub>3</sub>C<sub>2</sub>T<sub>x</sub>-250 for HCOOH dehydrogenation in NaF aqueous solution with different concentrations.

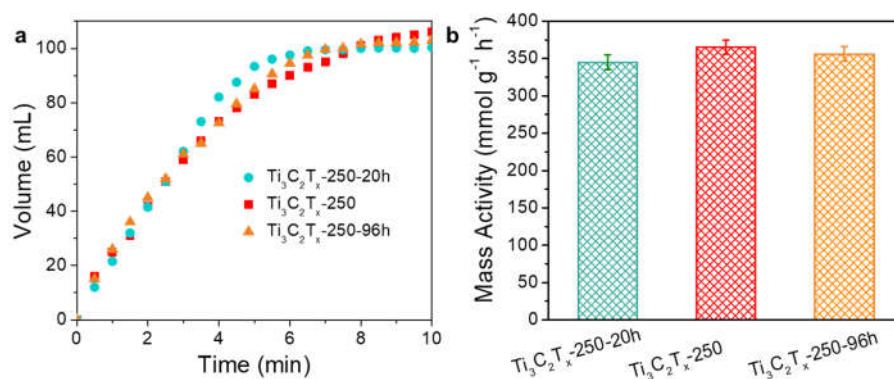

**Supplementary Figure 9.** Comparison of (a) the volume of the generated gas vs reaction time and (b) the mass activities of  $\text{Ti}_3\text{C}_2\text{T}_x$ -250-20h,  $\text{Ti}_3\text{C}_2\text{T}_x$ -250, and  $\text{Ti}_3\text{C}_2\text{T}_x$ -250-96h for HCOOH dehydrogenation.  $\text{Ti}_3\text{C}_2\text{T}_x$ -250-20h,  $\text{Ti}_3\text{C}_2\text{T}_x$ -250, and  $\text{Ti}_3\text{C}_2\text{T}_x$ -250-96h were prepared with the similar method except for the different etching time of 20, 72 and 96 h, respectively.

**Supplementary Table 6.** The activation energies of different catalysts for the dehydrogenation of HCOOH determined by Arrhenius plots.

| Sample                                 | Ea (KJ/mol) |
|----------------------------------------|-------------|
| $\text{Ti}_3\text{C}_2\text{T}_x$ -25  | 46.4±4.9    |
| $\text{Ti}_3\text{C}_2\text{T}_x$ -150 | 44.6±4.4    |
| $\text{Ti}_3\text{C}_2\text{T}_x$ -250 | 31.4±4.9    |
| $\text{Ti}_3\text{C}_2\text{T}_x$ -350 | 39.7±4.9    |
| Pt/C                                   | 39.1±2.7    |
| Pd/C                                   | 39.8±2.4    |



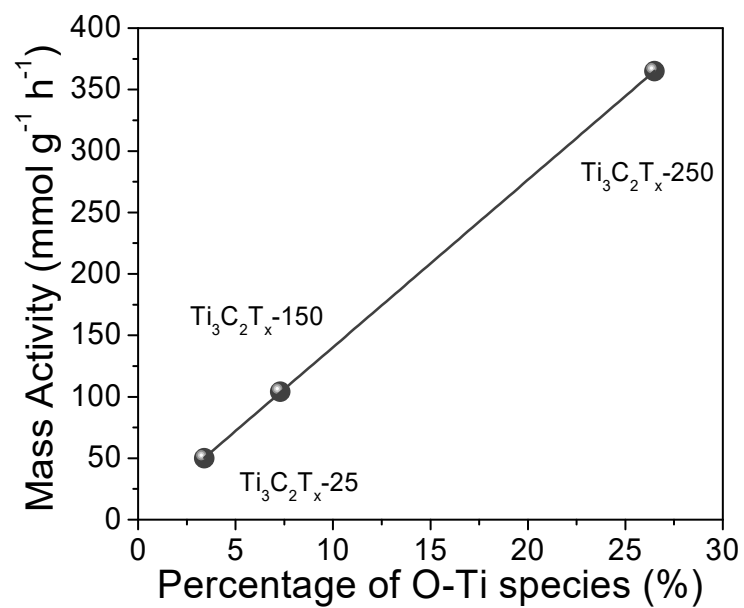

**Supplementary Figure 10.** The relationship between the percentage of O-Ti species and the activity of HCOOH dehydrogenation.

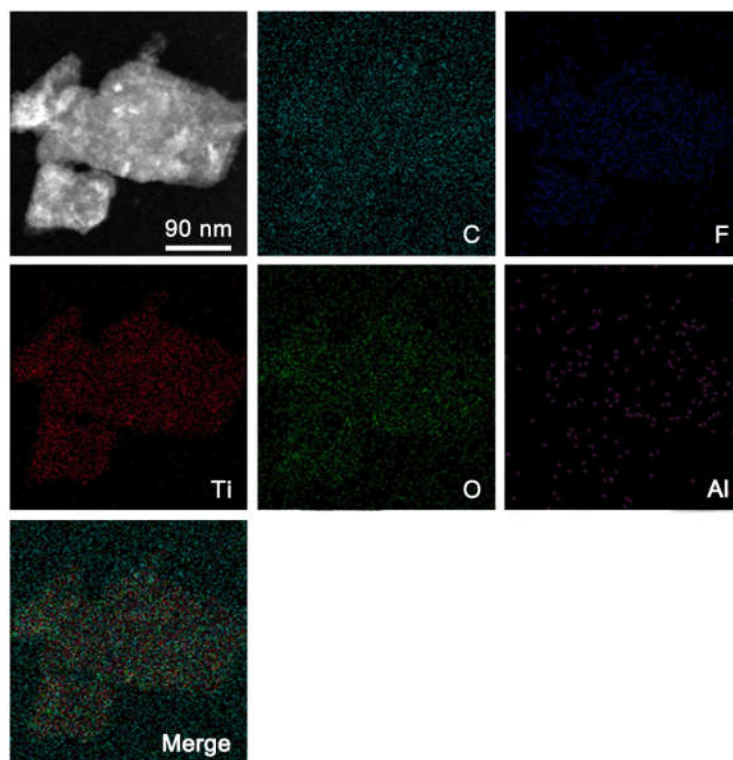

**Supplementary Figure 11.** HAADF-STEM and STEM-EDX elemental mapping of  $\text{Ti}_3\text{C}_2\text{T}_x$ -250 after catalytic test.

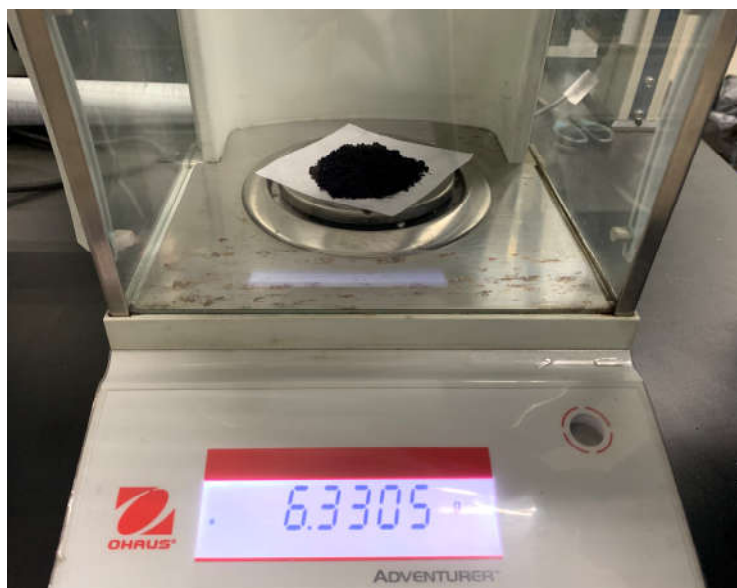

**Supplementary Figure 12.** The amount of  $\text{Ti}_3\text{C}_2\text{T}_x$ -25 prepared in one pot.

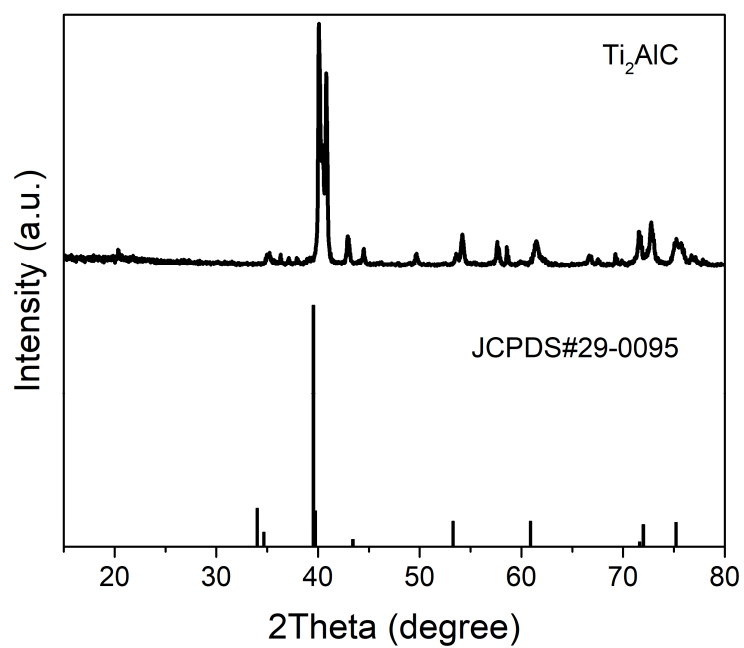

**Supplementary Figure 13.** XRD pattern of commercial  $\text{Ti}_2\text{AlC}$  powder.

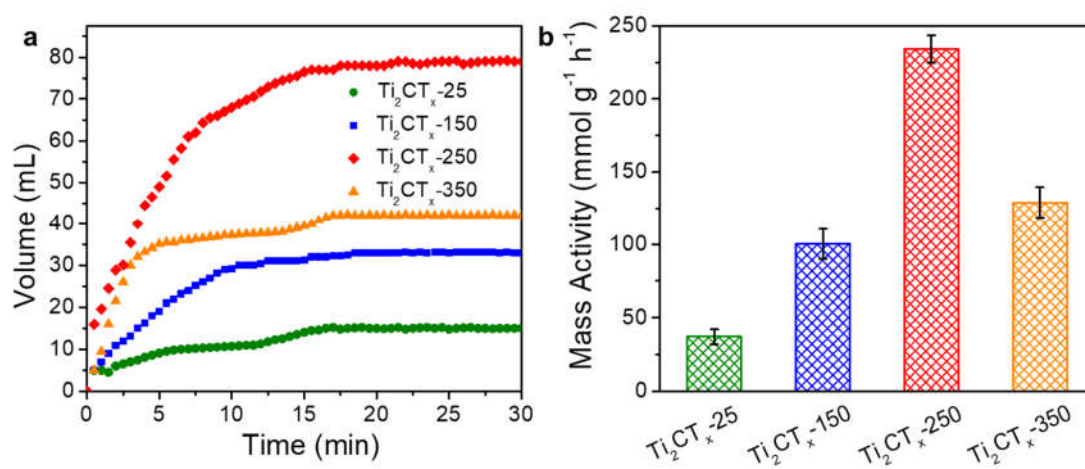

**Supplementary Figure 14.** (a) Plots of the volume of gas vs time at 80 °C, and (b) the mass activities in HCOOH dehydrogenation over  $Ti_2CT_x-25$ ,  $Ti_2CT_x-150$ ,  $Ti_2CT_x-250$ , and  $Ti_2CT_x-350$ .

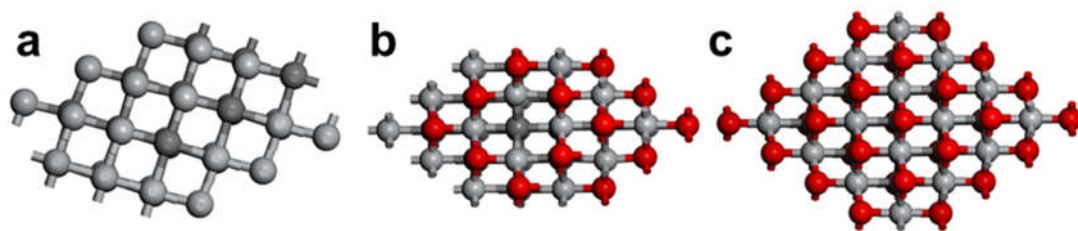

**Supplementary Figure 15.** The models of (a) Ti<sub>3</sub>C<sub>2</sub> without surface oxygen atoms, (b) Ti<sub>3</sub>C<sub>2</sub>O<sub>2</sub>-V with oxygen vacancies on the surface, and (c) Ti<sub>3</sub>C<sub>2</sub>O<sub>2</sub> with saturated oxygen coverage. The red, white, light gray and dark gray balls represent O, H, Ti, and C atoms, respectively.

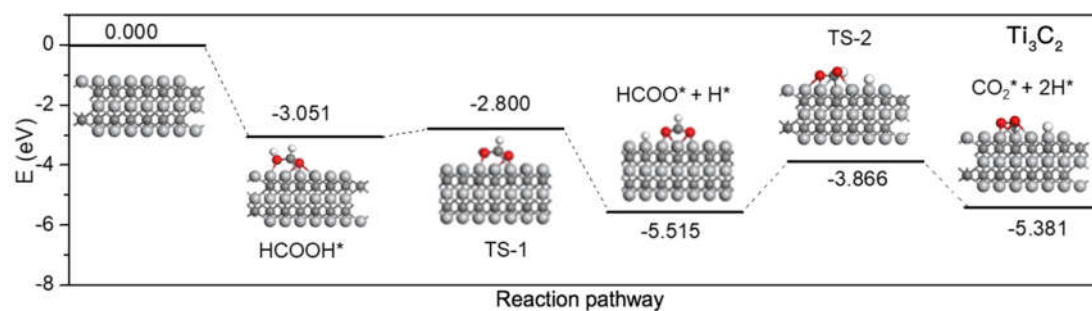

**Supplementary Figure 16.** Reaction paths for the dehydrogenation of HCOOH over  $\text{Ti}_3\text{C}_2$ . The red, white, light gray and dark gray balls represent O, H, Ti, and C atoms, respectively.

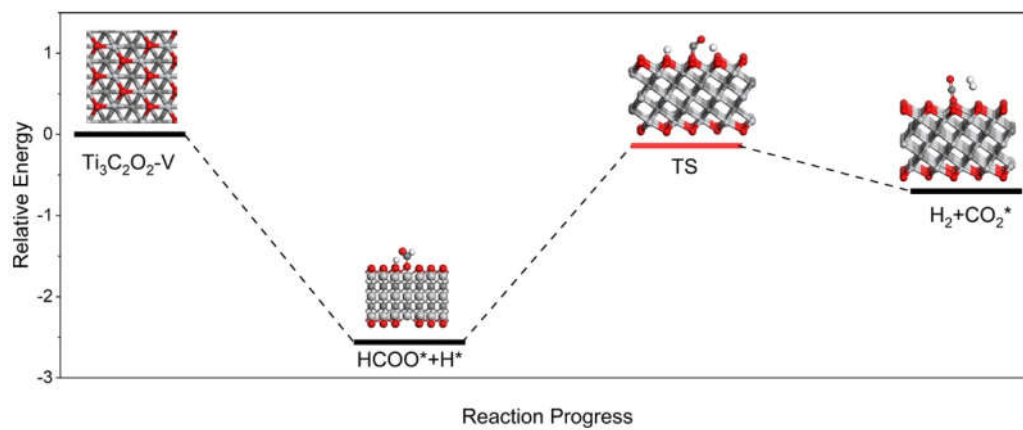

**Supplementary Figure 17.** Reaction paths for the dehydrogenation of HCOOH over  $\text{Ti}_3\text{C}_2\text{O}_2\text{-V}$ . The red, white, light gray and dark gray balls represent O, H, Ti, and C atoms, respectively.



**Supplementary Table 7.** The adsorption energy of CO<sub>2</sub> and H<sub>2</sub> on the surface of Ti<sub>3</sub>C<sub>2</sub> and Ti<sub>3</sub>C<sub>2</sub>O<sub>2</sub>.

| Models                                    | Ti <sub>3</sub> C <sub>2</sub> | Ti <sub>3</sub> C <sub>2</sub> O <sub>2</sub> |
|-------------------------------------------|--------------------------------|-----------------------------------------------|
| Adsorption energy of H <sub>2</sub> (eV)  | -0.51                          | -0.06                                         |
| Adsorption energy of CO <sub>2</sub> (eV) | -2.93                          | -0.16                                         |

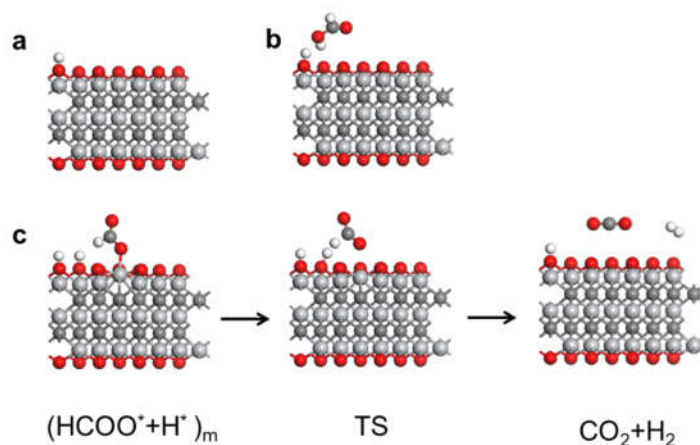

**Supplementary Figure 18.** (a) The model of Ti<sub>3</sub>C<sub>2</sub>O<sub>2</sub>-H<sub>1</sub> and (b) the adsorption configuration of HCOOH over Ti<sub>3</sub>C<sub>2</sub>O<sub>2</sub>-H<sub>1</sub>. (c) The dehydrogenation of the adsorbed HCOOH over Ti<sub>3</sub>C<sub>2</sub>O<sub>2</sub>-H. \* and m represent as the adsorbed species and meta-stable state, respectively. Ti<sub>3</sub>C<sub>2</sub>O<sub>2</sub>-H<sub>1</sub> exhibited a stronger adsorption for HCOOH with an adsorption energy of -0.53 eV than that of Ti<sub>3</sub>C<sub>2</sub>O<sub>2</sub> with the adsorption energy of -0.35 eV. In addition, we also simulated the process of the H<sub>2</sub> formation on Ti<sub>3</sub>C<sub>2</sub>O<sub>2</sub>-H<sub>1</sub>, where the activation energy was computed to be 0.57 eV, very close to that over Ti<sub>3</sub>C<sub>2</sub>O<sub>2</sub> with the value of 0.61 eV. Thus, the surface OH groups on Ti<sub>3</sub>C<sub>2</sub>O<sub>2</sub> might slightly boost the dehydrogenation of HCOOH. The red, white, light gray, and dark gray balls represent O, H, Ti, and C atoms, respectively.

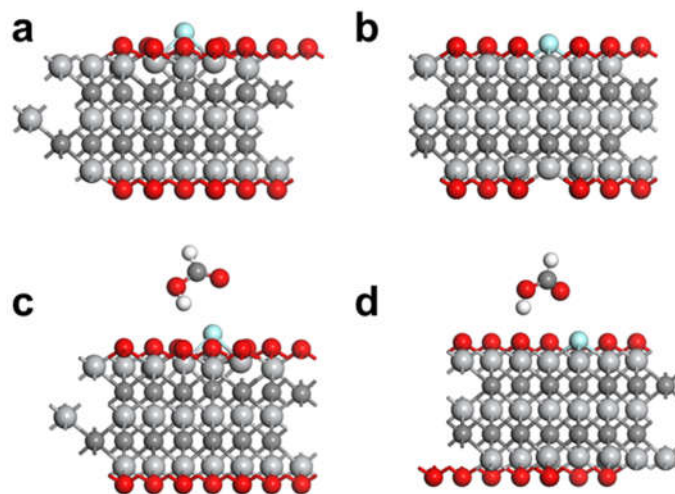

**Supplementary Figure 19.** The models of (a)  $F_1@Ti_3C_2O_2$  and (b)  $F_1@Ti_3C_2O_2-V$ . The adsorption configuration of HCOOH over (c)  $F_1@Ti_3C_2O_2$  and (d)  $F_1@Ti_3C_2O_2-V$ .  $F_1@Ti_3C_2O_2$  and  $F_1@Ti_3C_2O_2-V$  represent a single F atom adsorbed on  $Ti_3C_2O_2$  and  $Ti_3C_2O_2-V$ , respectively.  $F_1@Ti_3C_2O_2$  exhibited a weak adsorption for HCOOH with the adsorption energy of -0.17 eV. As for  $F_1@Ti_3C_2O_2-V$ , a similar adsorption energy of -0.36 eV was observed compared with that for  $Ti_3C_2O_2-V$  with the value of -0.35 eV. Therefore, the influence of F species on HCOOH dehydrogenation was negligible in this case. The red, white, light gray, dark gray, and green balls represent O, H, Ti, C, and F atoms, respectively.

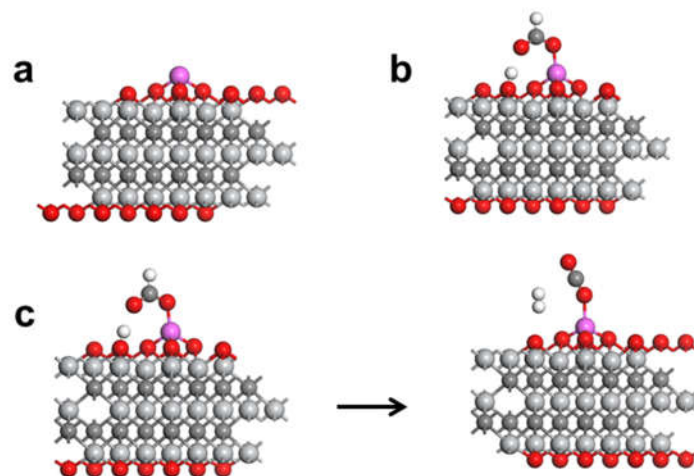

**Supplementary Figure 20.** (a) The model of  $\text{Al}_1@ \text{Ti}_3\text{C}_2\text{O}_2$  and (b) the adsorption configuration of  $\text{HCOOH}$  over  $\text{Al}_1@ \text{Ti}_3\text{C}_2\text{O}_2$ . (c) The dehydrogenation of the adsorbed  $\text{HCOOH}$  over  $\text{Al}_1@ \text{Ti}_3\text{C}_2\text{O}_2$ .  $\text{HCOOH}$  had a dissociation adsorption on the surface of  $\text{Al}_1@ \text{Ti}_3\text{C}_2\text{O}_2$  to generate  $\text{HCOO-Al}^*$  and  $\text{H}^*$  with the adsorption energy of  $-3.29$  eV (Panel B). The subsequent dissociation of  $\text{HCOO-Al}^*$  to  $\text{COO-Al}^*$  was severely impeded thermodynamically with the reaction energy up to  $2.46$  eV (Panel C). The red, white, light gray, dark gray, and pink balls represent O, H, Ti, C, and Al atoms, respectively.

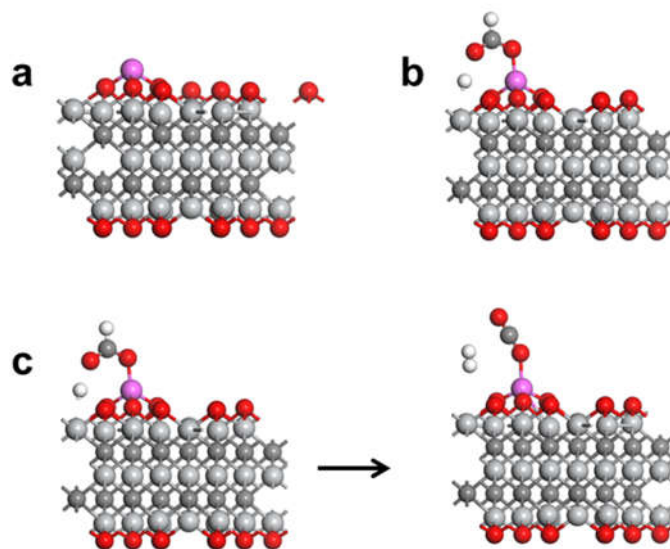

**Supplementary Figure 21.** (a) The model of Al<sub>1</sub>@Ti<sub>3</sub>C<sub>2</sub>O<sub>2</sub>-V and (b) the adsorption configuration of HCOOH over Al<sub>1</sub>@Ti<sub>3</sub>C<sub>2</sub>O<sub>2</sub>-V. (c) The dehydrogenation of the adsorbed HCOOH over Al<sub>1</sub>@Ti<sub>3</sub>C<sub>2</sub>O<sub>2</sub>-V. HCOOH had a dissociation adsorption on the surface of Al<sub>1</sub>@Ti<sub>3</sub>C<sub>2</sub>O<sub>2</sub>-V to generate HCOO-Al\* and H\* with the adsorption energy of -3.26 eV (Panel B). The subsequent dissociation of HCOO-Al\* to COO-Al\* was severely impeded thermodynamically with the reaction energy up to 2.54 eV (Panel C). The red, white, light gray, dark gray, and pink balls represent O, H, Ti, C, and Al atoms, respectively.

## Supplementary References

- S1. Wang, J. L. *et al.* Non-precious molybdenum-based catalyst derived from biomass: CO-free hydrogen production from formic acid at low temperature. *Energy Convers. Manage.* **164**, 122-131 (2018).
- S2. Tang, C. H. *et al.* A stable nanocobalt catalyst with highly dispersed CoN<sub>x</sub> active sites for the selective dehydrogenation of formic acid. *Angew. Chem., Int. Ed.* **56**, 16616-16620 (2017).
- S3. Bide, Y., Nabid, M. R. & Etemadi, B. Facile synthesis and catalytic application of selenium doped graphene/CoFe<sub>2</sub>O<sub>4</sub> for highly efficient and noble metal free dehydrogenation of formic acid. *Int. J. Hydrogen Energy* **41**, 20147-20155 (2016).
- S4. Bertini, F., Mellone, I., Ienco, A., Peruzzini, M. & Gonsalvi, L. Iron(II) complexes of the linear rac-tetraphos-1 ligand as efficient homogeneous catalysts for sodium bicarbonate hydrogenation and formic acid dehydrogenation. *ACS Catal.* **5**, 1254-1265 (2015).
- S5. Kuehnle, M. F., Wakerley, D. W., Orchard, K. L. & Reisner, E. Photocatalytic formic acid conversion on CdS nanocrystals with controllable selectivity for H<sub>2</sub> or CO. *Angew. Chem., Int. Ed.* **54**, 9627-9631 (2015).
- S6. Enthaler, S. *et al.* Exploring the reactivity of nickel pincer complexes in the decomposition of formic acid to CO<sub>2</sub>/H<sub>2</sub> and the hydrogenation of NaHCO<sub>3</sub> to HCOONa. *ChemCatChem* **7**, 65-69 (2015).
- S7. Bielinski, E. A. *et al.* Lewis acid-assisted formic acid dehydrogenation using a pincer-supported iron catalyst. *J. Am. Chem. Soc.* **136**, 10234-10237 (2014).
- S8. Myers, T. W. & Berben, L. A. Aluminium-ligand cooperation promotes selective dehydrogenation of formic acid to H<sub>2</sub> and CO<sub>2</sub>. *Chem. Sci.* **5**, 2771-2777 (2014).
- S9. Koroteev, V. O., Bulushev, D. A., Chuvilin, A. L., Okotrub, A. V. & Bulusheva, L. G. Nanometer-sized MoS<sub>2</sub> clusters on graphene flakes for catalytic formic acid decomposition. *ACS Catal.* **4**, 3950-3956 (2014).
- S10. Zell, T., Butschke, B., Ben-David, Y. & Milstein, D. Efficient hydrogen liberation from formic acid catalyzed by a well-defined iron pincer complex under mild conditions. *Chem. Eur. J.*

19, 8068-8072 (2013).

S11. Boddien, A. *et al.* Efficient dehydrogenation of formic acid using an iron catalyst. *Science* **333**, 1733-1736 (2011).

S12. Boddien, A. *et al.* ortho-Metalation of iron(0) tribenzylphosphine complexes: homogeneous catalysts for the generation of hydrogen from formic acid. *Angew. Chem., Int. Ed.* **49**, 8993-8996 (2010).

S13. Boddien, A. *et al.* Catalytic generation of hydrogen from formic acid and its derivatives: useful hydrogen storage materials. *J. Am. Chem. Soc.* **132**, 8924–8934 (2010).
